# Supplementary material for: matOptimize: a parallel tree optimization method enables online phylogenetics for SARS-CoV-2
Source: PubMed Central journal article supplement — Bioinformatics. 2022 Jun 22;38(15):3734–40. doi: 10.1093/bioinformatics/btac401 (PMC9344837; doi:10.1093/bioinformatics/btac401), 2022-06-22
Supplement: btac401_supplementary_data.pdf [file btac401_supplementary_data.pdf]

## Supplementary Figures And Tables

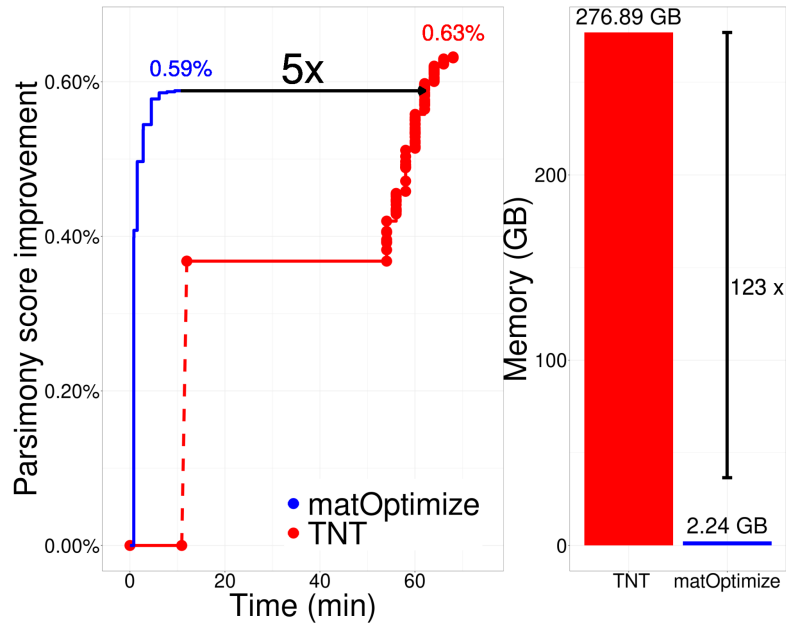

**Figure S1.** Comparison of parsimony score improvement and peak memory requirement of matOptimize and TNT, both using 40 threads on m1-ultramem-40 instance, starting from the SARS-CoV-2 based UShER-derived 100K-sample tree.

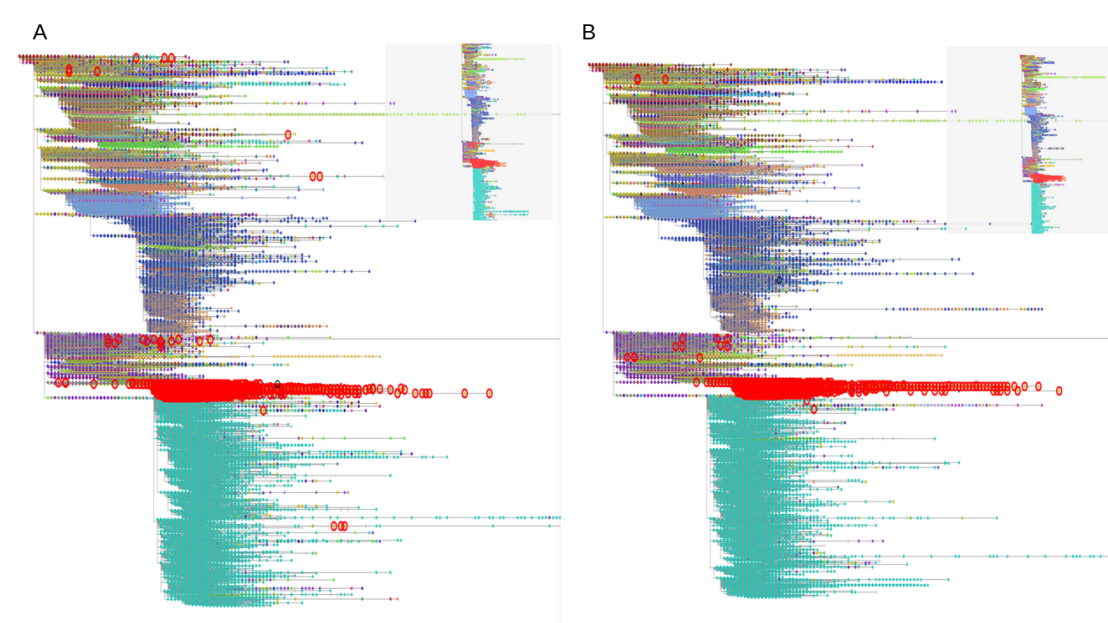

**Figure S2:** Taxonium (<https://taxonium.org/>) view of the 1M-sample tree (A) before and (B) after optimization. The tips of the trees are colored based on the lineage assignments derived from a trained PangoLEARN model (29), with P.1 labels highlighted using red circles.

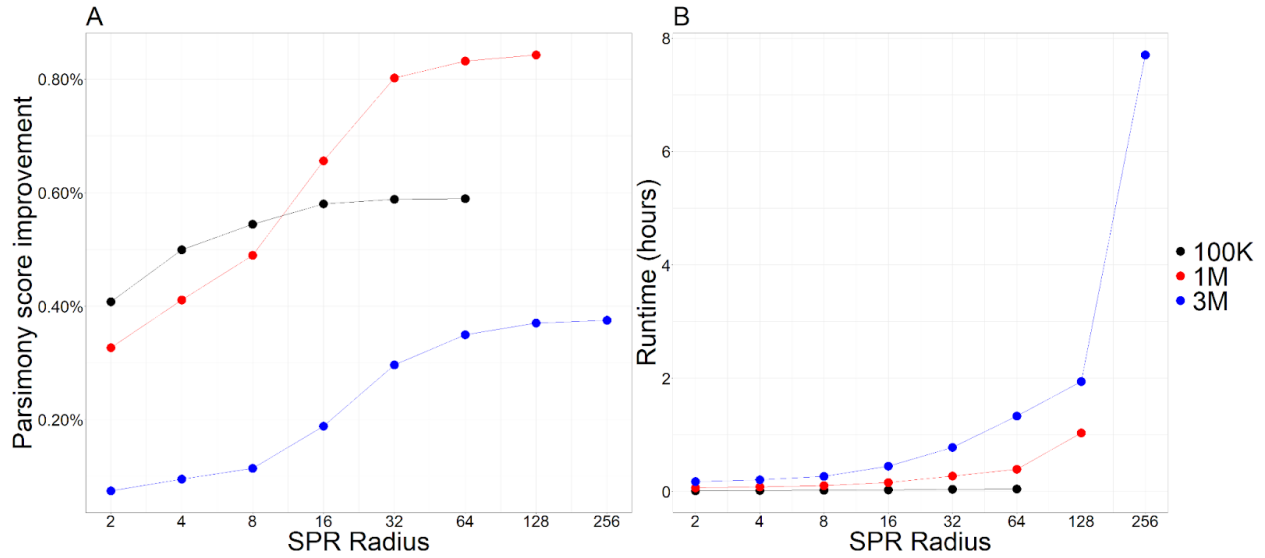

**Figure S3: (A)** Parsimony score improvement and **(B)** the total runtime for different SPR radius achieved through the radius doubling mode in matOptimize.

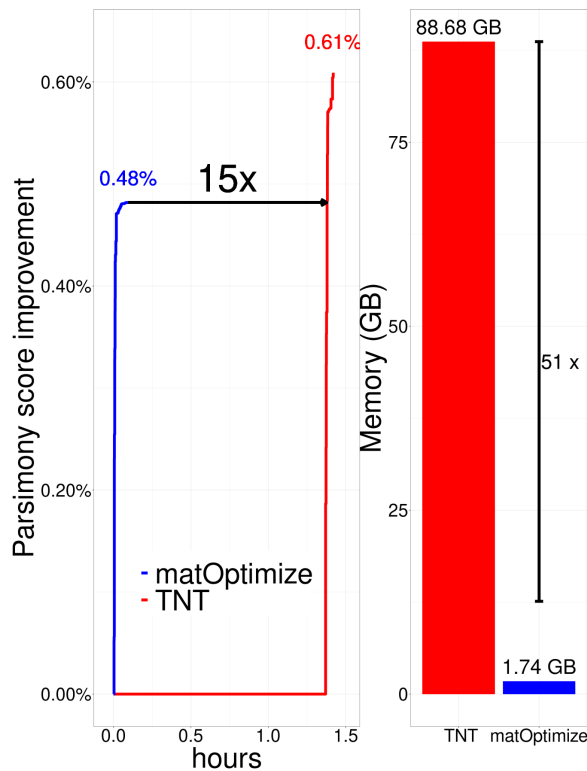

**Figure S4.** Comparison of parsimony score improvement and peak memory requirement of matOptimize and TNT starting from the based UShER-derived 10K-sample tree of the *Mycobacterium tuberculosis* complex dataset. Benchmarking was done on iso-cost e2 instances of the Google Cloud Platform (GCP). TNT provided noticeably higher parsimony score improvement – 0.61% compared to 0.48% through matOptimize, but the log likelihood score of the two trees differed only by 0.007%.

| Tree size<br>(number of samples) | Parsimony Score Improvement |              |
|----------------------------------|-----------------------------|--------------|
|                                  | Radius Doubling             | Fixed Radius |
| 100K                             | 0.182%                      | 0.182%       |
| 1M                               | 0.842%                      | 0.798%       |
| 3M                               | 0.375%                      | 0.376%       |

**Table S1:** Parsimony score improvement with fixed radius and radius doubling optimization strategies in matOptimize.
